# Supplementary material for: Maternal singing sustains preterm hospitalized newborns’ autonomic nervous system maturation: an RCT
Source: PubMed Central journal article supplement (PMC10920191; doi:10.1038/s41390-023-02932-4), 2023-12-06
Supplement: 41390_2023_2932_MOESM1_ESM.pdf [file 41390_2023_2932_MOESM1_ESM.pdf]

Supplementary material

Consort Diagram

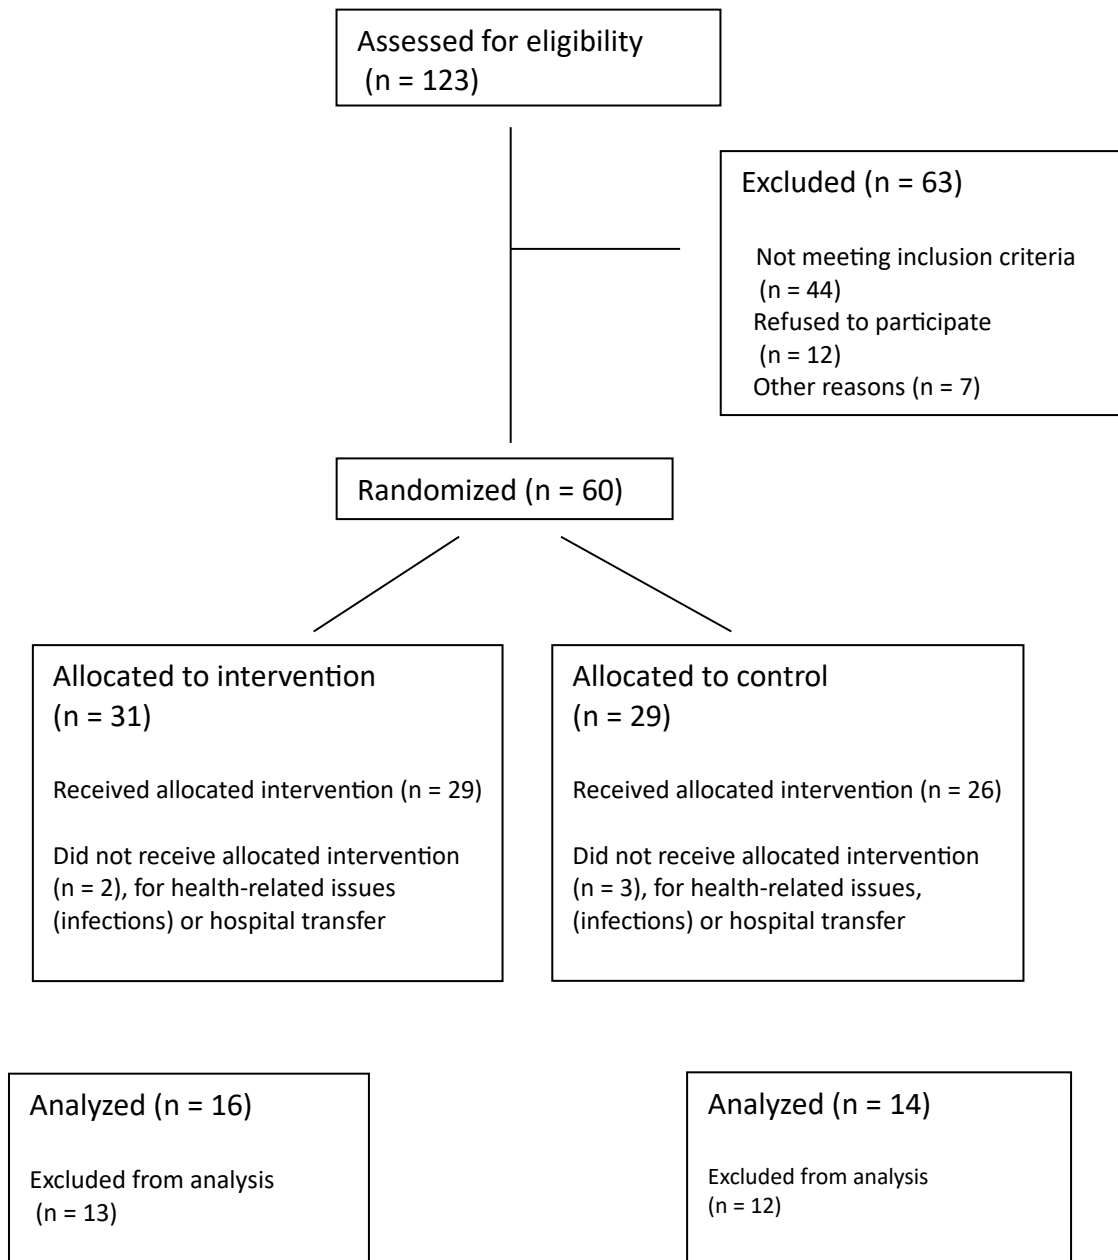

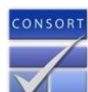

## CONSORT 2010 checklist of information to include when reporting a randomised trial\*

| Section/Topic                         | Item No | Checklist item                                                                                                                        | Reported on page No |
|---------------------------------------|---------|---------------------------------------------------------------------------------------------------------------------------------------|---------------------|
| <b>Title and abstract</b>             |         |                                                                                                                                       |                     |
|                                       | 1a      | Identification as a randomised trial in the title                                                                                     | 1                   |
|                                       | 1b      | Structured summary of trial design, methods, results, and conclusions (for specific guidance see CONSORT for abstracts)               | 2                   |
| <b>Introduction</b>                   |         |                                                                                                                                       |                     |
| Background and objectives             | 2a      | Scientific background and explanation of rationale                                                                                    | 3-6                 |
|                                       | 2b      | Specific objectives or hypotheses                                                                                                     | 6                   |
| <b>Methods</b>                        |         |                                                                                                                                       |                     |
| Trial design                          | 3a      | Description of trial design (such as parallel, factorial) including allocation ratio                                                  | 7                   |
|                                       | 3b      | Important changes to methods after trial commencement (such as eligibility criteria), with reasons                                    | NA                  |
| Participants                          | 4a      | Eligibility criteria for participants                                                                                                 | 7                   |
|                                       | 4b      | Settings and locations where the data were collected                                                                                  | 7                   |
| Interventions                         | 5       | The interventions for each group with sufficient details to allow replication, including how and when they were actually administered | 7-8                 |
| Outcomes                              | 6a      | Completely defined pre-specified primary and secondary outcome measures, including how and when they were assessed                    | 8-10                |
|                                       | 6b      | Any changes to trial outcomes after the trial commenced, with reasons                                                                 | NA                  |
| Sample size                           | 7a      | How sample size was determined                                                                                                        | 10                  |
|                                       | 7b      | When applicable, explanation of any interim analyses and stopping guidelines                                                          | NA                  |
| Randomisation:<br>Sequence generation | 8a      | Method used to generate the random allocation sequence                                                                                | 6                   |
|                                       | 8b      | Type of randomisation; details of any restriction (such as blocking and block size)                                                   | 6                   |

|                                                      |     |                                                                                                                                                                                             |                        |
|------------------------------------------------------|-----|---------------------------------------------------------------------------------------------------------------------------------------------------------------------------------------------|------------------------|
| Allocation concealment mechanism                     | 9   | Mechanism used to implement the random allocation sequence (such as sequentially numbered containers), describing any steps taken to conceal the sequence until interventions were assigned | 6                      |
| Implementation                                       | 10  | Who generated the random allocation sequence, who enrolled participants, and who assigned participants to interventions                                                                     | 6                      |
| Blinding                                             | 11a | If done, who was blinded after assignment to interventions (for example, participants, care providers, those assessing outcomes) and how                                                    | NA                     |
|                                                      | 11b | If relevant, description of the similarity of interventions                                                                                                                                 | NA                     |
| Statistical methods                                  | 12a | Statistical methods used to compare groups for primary and secondary outcomes                                                                                                               | 11                     |
|                                                      | 12b | Methods for additional analyses, such as subgroup analyses and adjusted analyses                                                                                                            | NA                     |
| <b>Results</b>                                       |     |                                                                                                                                                                                             |                        |
| Participant flow (a diagram is strongly recommended) | 13a | For each group, the numbers of participants who were randomly assigned, received intended treatment, and were analysed for the primary outcome                                              | Supplementary material |
|                                                      | 13b | For each group, losses and exclusions after randomisation, together with reasons                                                                                                            | Supplementary material |
| Recruitment                                          | 14a | Dates defining the periods of recruitment and follow-up                                                                                                                                     | 6                      |
|                                                      | 14b | Why the trial ended or was stopped                                                                                                                                                          | NA                     |
| Baseline data                                        | 15  | A table showing baseline demographic and clinical characteristics for each group                                                                                                            | 7                      |
| Numbers analysed                                     | 16  | For each group, number of participants (denominator) included in each analysis and whether the analysis was by original assigned groups                                                     | Supplementary material |
| Outcomes and estimation                              | 17a | For each primary and secondary outcome, results for each group, and the estimated effect size and its precision (such as 95% confidence interval)                                           | 8-10                   |
|                                                      | 17b | For binary outcomes, presentation of both absolute and relative effect sizes is recommended                                                                                                 | 11-12                  |
| Ancillary analyses                                   | 18  | Results of any other analyses performed, including subgroup analyses and adjusted analyses,                                                                                                 | 11-12                  |

|                          |    |                                                                                                                  |       |
|--------------------------|----|------------------------------------------------------------------------------------------------------------------|-------|
|                          |    | distinguishing pre-specified from exploratory                                                                    |       |
| Harms                    | 19 | All important harms or unintended effects in each group (for specific guidance see CONSORT for harms)            | NA    |
| <b>Discussion</b>        |    |                                                                                                                  |       |
| Limitations              | 20 | Trial limitations, addressing sources of potential bias, imprecision, and, if relevant, multiplicity of analyses | 15    |
| Generalisability         | 21 | Generalisability (external validity, applicability) of the trial findings                                        | 16    |
| Interpretation           | 22 | Interpretation consistent with results, balancing benefits and harms, and considering other relevant evidence    | 13-16 |
| <b>Other information</b> |    |                                                                                                                  |       |
| Registration             | 23 | Registration number and name of trial registry                                                                   | 23    |
| Protocol                 | 24 | Where the full trial protocol can be accessed, if available                                                      | 23    |
| Funding                  | 25 | Sources of funding and other support (such as supply of drugs), role of funders                                  | 20    |
